# Supplementary material
Source: PubMed Central journal article supplement (PMC6416448)
Supplement: supp_RA118.006123_141139_1_supp_264603_pl49qv.pdf [file supp_RA118.006123_141139_1_supp_264603_pl49qv.pdf]

## Figure S1

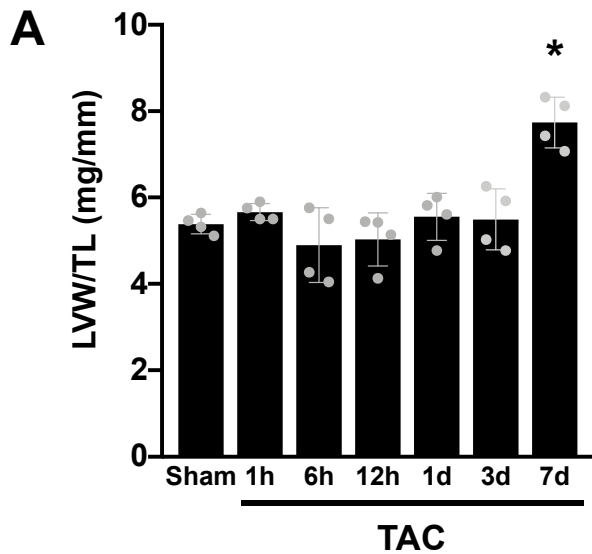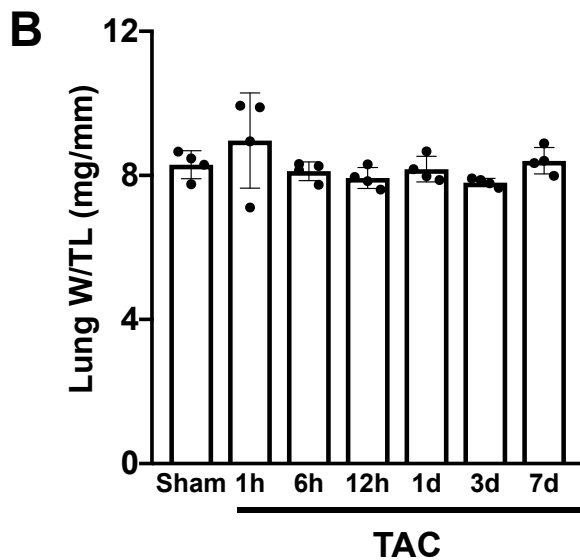

**Supporting Information Figure 1.** TAC was performed to generate PO for 7 days using wild type mice. Some mice were subjected to sham operation. Hearts and lungs were harvested at the indicated time points (1 hour - 7 days). The left ventricle weight (LVW)/ tibia length (TL) and the lung weight (Lung W)/TL were calculated. Values are means  $\pm$  SD. \* $p < 0.05$  versus Sham-operated mice.  $n = 4$ . Statistical analyses were conducted with ANOVA. Post-hoc analysis was conducted with Tukey's test.

# Figure S2

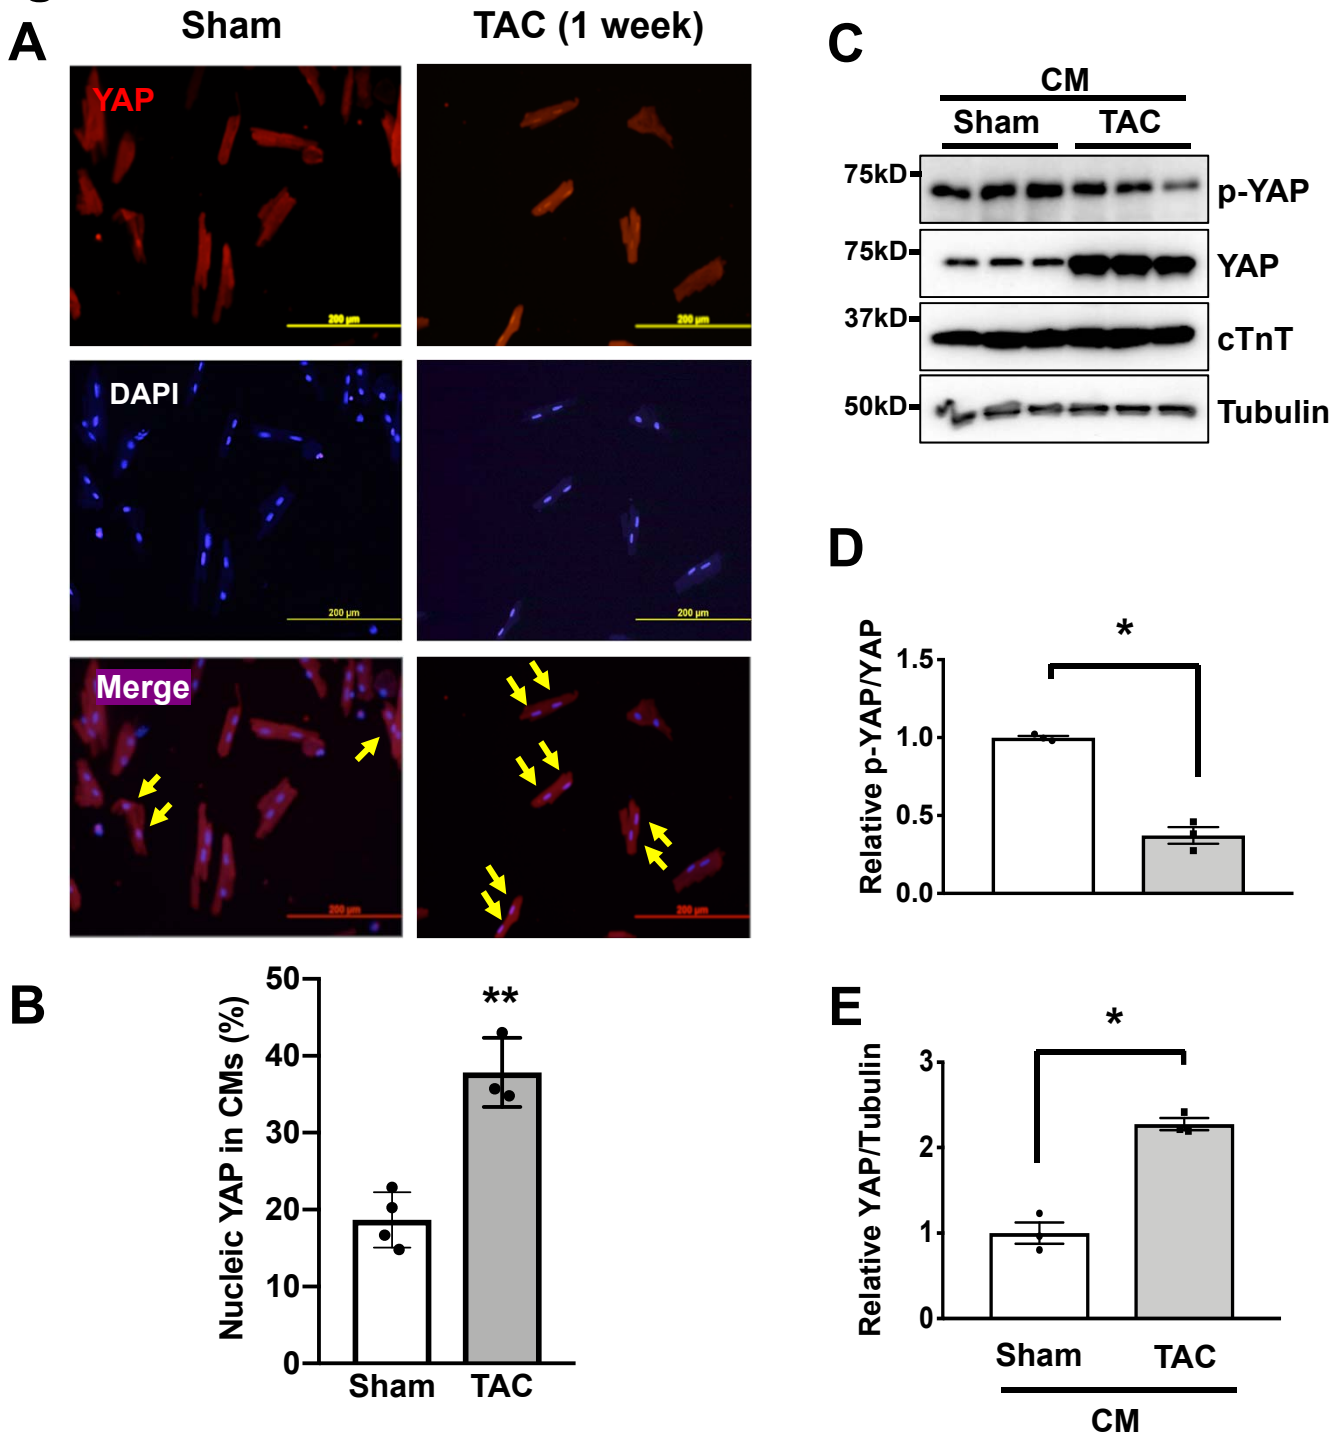

## Supporting Information Figure 2. PO induced YAP activation in isolated adult CMs.

Adult CMs were isolated from wild type mice 1 week after Sham or TAC surgery.  $n = 3 - 4$  independent experiments. (A) Representative images of YAP immunostaining, which was performed using anti-YAP antibody and DAPI staining. Nucleic YAP in CMs is indicated by arrows. (B) Quantification of results from A. (C) Immunoblots detecting p-YAP, total YAP, cTnT and Tubulin in isolated adult CMs. (D and E) Quantification of results obtained from C. Values are mean  $\pm$  SD. \* $p < 0.05$  in comparison to Sham group.

# Figure S3

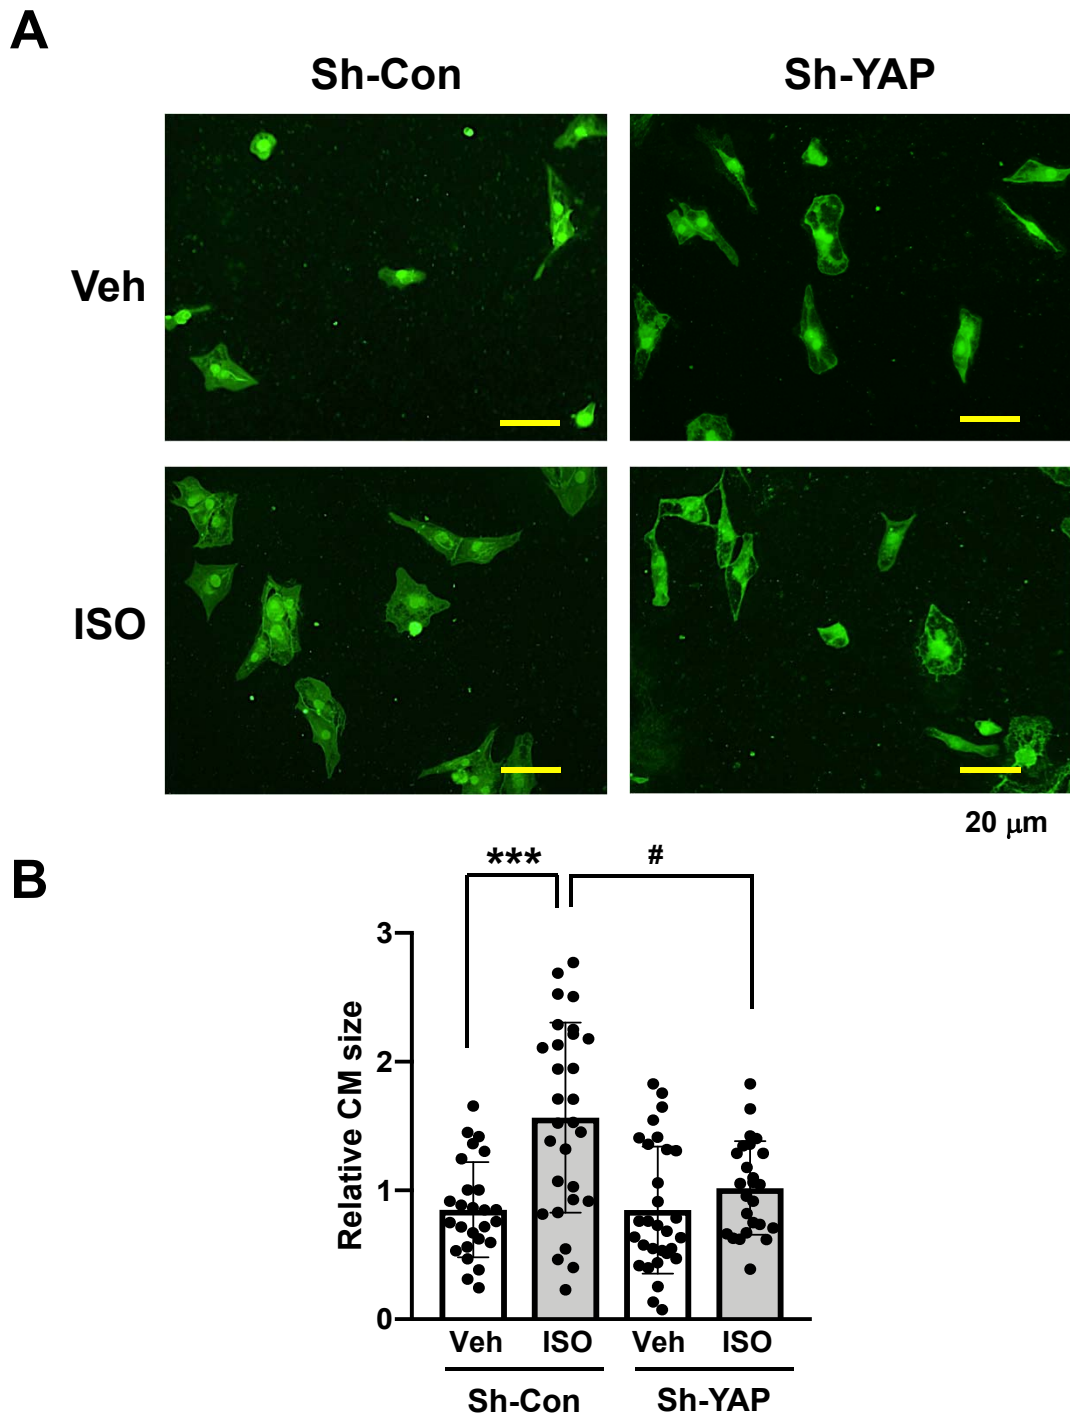

**Supporting Information Figure 3. Depletion of YAP attenuates CM hypertrophy.** CMs were infected with adenovirus harboring scrambled control (**Sh-Con**) or YAP-targeted short-hairpin (**Sh-YAP**), treated with vehicle (**Veh**) or isoproterenol (**ISO**; 10  $\mu$ M) and harvested 72 hours later. CMs were stained with wheat germ agglutinin. **A**, Representative data. **B**, Quantitative analyses of **A**. The data are expressed as ratios relative to the mean value of the Sh-Con+Veh CMs. Values are means  $\pm$  SD. \*\*\* $p$  < 0.0005, versus Sh-Con + Veh CMs. # $p$  < 0.05 versus Sh-Con + ISO CMs.  $n$  = 26 - 32. Values are means  $\pm$  SD. Statistical analyses were conducted with ANOVA. Post-hoc analysis was conducted with Tukey's test. Scale bar; 20  $\mu$ m.

## Figure S4

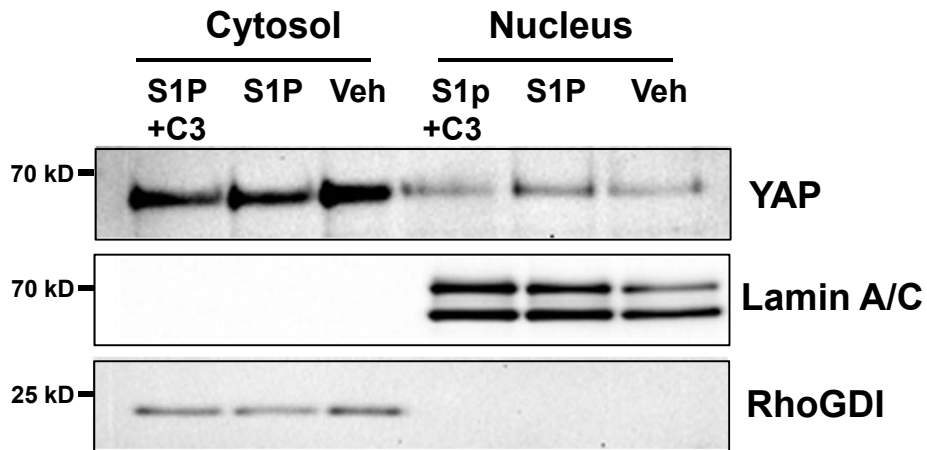

**Supporting Information Figure 4.** Neonatal rat cardiomyocytes (CMs) were treated with vehicle (veh), S1P (Sphingosine-1-phosphate), or S1P and C3 exoenzyme. Nuclear and cytosolic fractions were isolated by subcellular fractionation and then immunoblotted with anti-YAP antibody. RhoGDI and Lamin A/C are markers for cytosolic and nuclear fractions, respectively. Experiments are repeated 4 times.

**Figure S5**

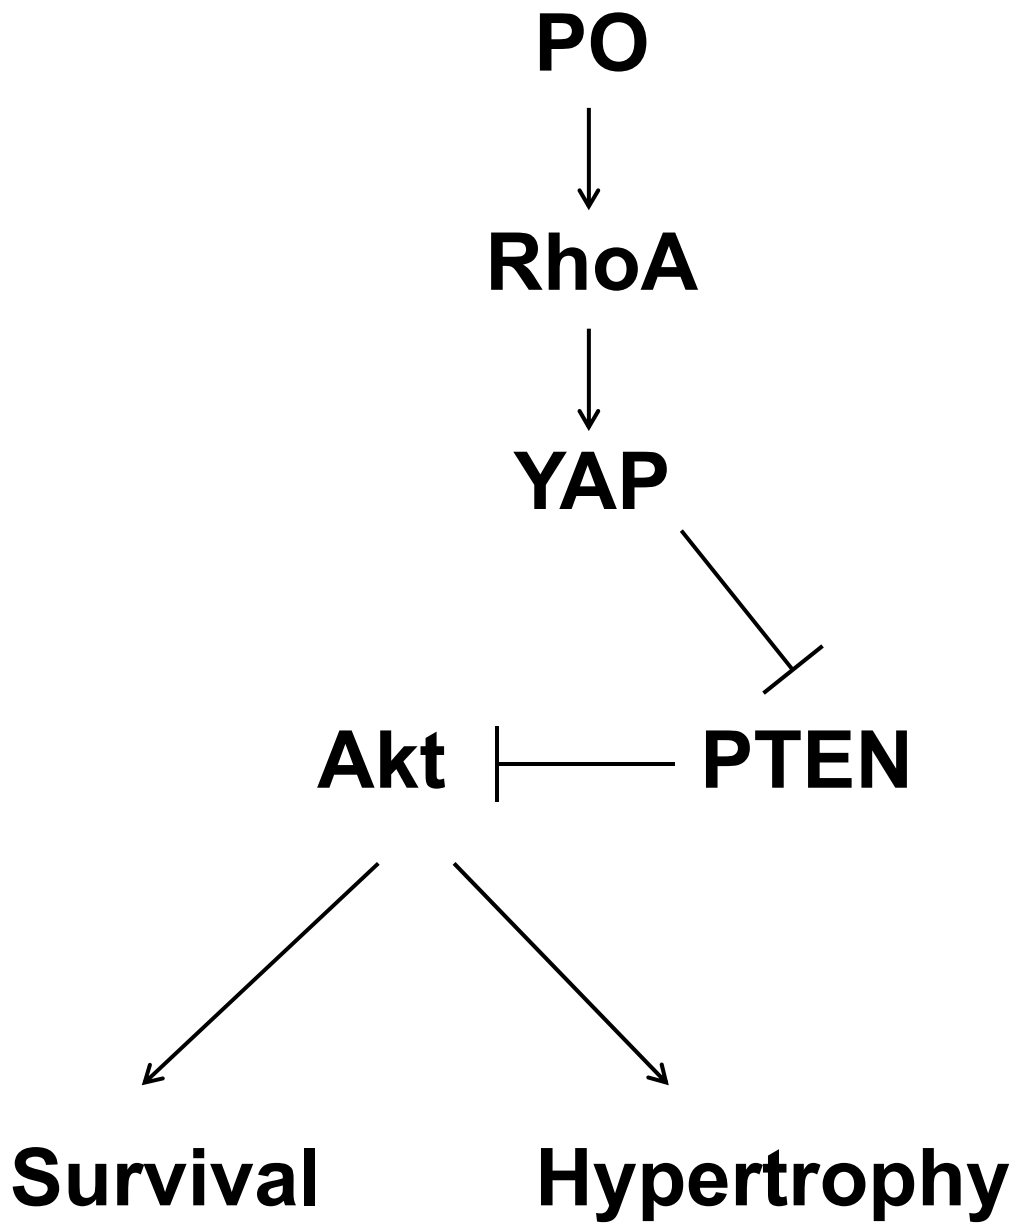

**Supporting Information Figure 5.** Schematic model of RhoA, YAP and Akt interaction in the regulation of CM hypertrophy and survival in the heart in response to PO.
